# Supplementary material
Source: bioRxiv or medRxiv preprint supplement (https://www.biorxiv.org/highwire/filestream/4359/field_highwire_adjunct_files/4/017178-5.pdf)

log10(flows)

0.36 \*\*\*

0.43 \*\*\*

CC

0.19 \*

-GCD

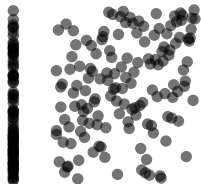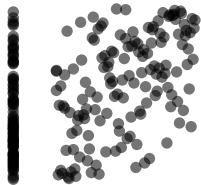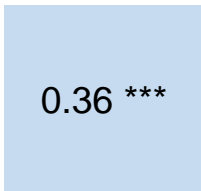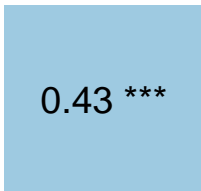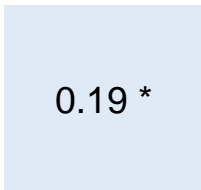

Supplement: Supplementary file [file 017178-5.pdf]
